# Supplementary material for: Nanoimaging granule dynamics and subcellular structures in activated mast cells using soft X-ray tomography
Source: PubMed Central journal article supplement (PMC5066221; doi:10.1038/srep34879), 2016-10-17

## **Nanoimaging granule dynamics and subcellular structures in activated mast cells using soft X-ray tomography**

Huan-Yuan Chen<sup>1</sup>, Meng-Lin Chiang<sup>1</sup>, Zi-Jing Lin<sup>2</sup>, Chia-Chun Hsieh<sup>2</sup>, Gung-Chian Yin<sup>2</sup>, I-Chun Weng<sup>1</sup>, Peter Guttermann<sup>3</sup>, Stephan Werner<sup>3</sup> and Katja Henzler<sup>3</sup>, Gerd Schneider<sup>3,4</sup>, Lee-Jene Lai<sup>2</sup>, Fu-Tong Liu<sup>1,5,\*</sup>

### **Supplementary Information**

#### **Supplementary video S1: Reconstructed soft X-ray tomography 3D video of granules in non-activating mast cells**

RBL-2H3 cells were grown on gold grids coated with Quantifoil holey-carbon films, sensitized with anti-DNP IgE and then kept for 30 min without stimulation. The cells were pre-labeled with fluorescent dye and frozen with a plunge freezer in liquid ethane. Images of the cryo-cells were captured at the U41-SGM HZB beamline TXM endstation, BESSY II. The video is a reconstructed SXT image by IMOD and MATLAB software to show morphological 3D structures of granules.

#### **Supplementary video S2: Granule morphology in non-activating mast cell**

The samples were prepared as in Supplementary video S1. This is the stack images of a SXT image reconstructed by IMOD software.

#### **Supplementary video S3: Granule morphology in activating mast cell**

The samples were prepared as in Supplementary video S1, except IgE-pulsed cells were stimulated with DNP-BSA for 30 min.

#### **Supplementary video S4: Granule dynamics in mast cell degranulation by SXT**

The samples were prepared as in Supplementary video S3, except IgE-pulsed cells were stimulated with DNP-BSA for 3 min.

**Supplementary Fig. S5: Granule cavity formation in mast cell degranulation from freeze-substitution TEM**

The samples were prepared as in Supplementary video S3, except the images are freeze-substitution TEM images of the cryo-cells captured by FEI Tecnai G2 TF20 S-TWIN microscopy.

**Supplementary video S6: Reconstructed SXT 3D video of mitochondria in non-activating mast cells**

The samples were prepared as in Supplementary video 5B.

**Supplementary video S7: Reconstructed SXT 3D video of mitochondria in activating mast cells**

The procedure is the same with Supplementary video 5F.

**Supplementary video S8: Granule-containing vesicles in mast cell degranulation from SXT**

The video corresponds to Fig. 7A.

**Supplementary video S9: Reconstructed soft X-ray tomography 3D video of Granule-containing vesicles in mast cell degranulation from soft X-ray tomography**

The video corresponds to Fig. 7C.

**Supplementary video S10: Reconstructed soft X-ray tomography 3D video of Granule-containing vesicles in mast cell degranulation from soft X-ray tomography**

The video corresponds to Fig. 7F.

**Supplementary video S11: Time-lapse images of granule dynamics upon mast cell activation**

Anti-DNP IgE-sensitized RBL Cells were pre-stained with lysotracker (red) and bodipy (green) and then stimulated with DNP-BSA for 45 min. Scale bars represent 5 microns.

Supplementary Fig. S5: Granule cavity formation in mast cell degranulation from freeze-substitution TEM

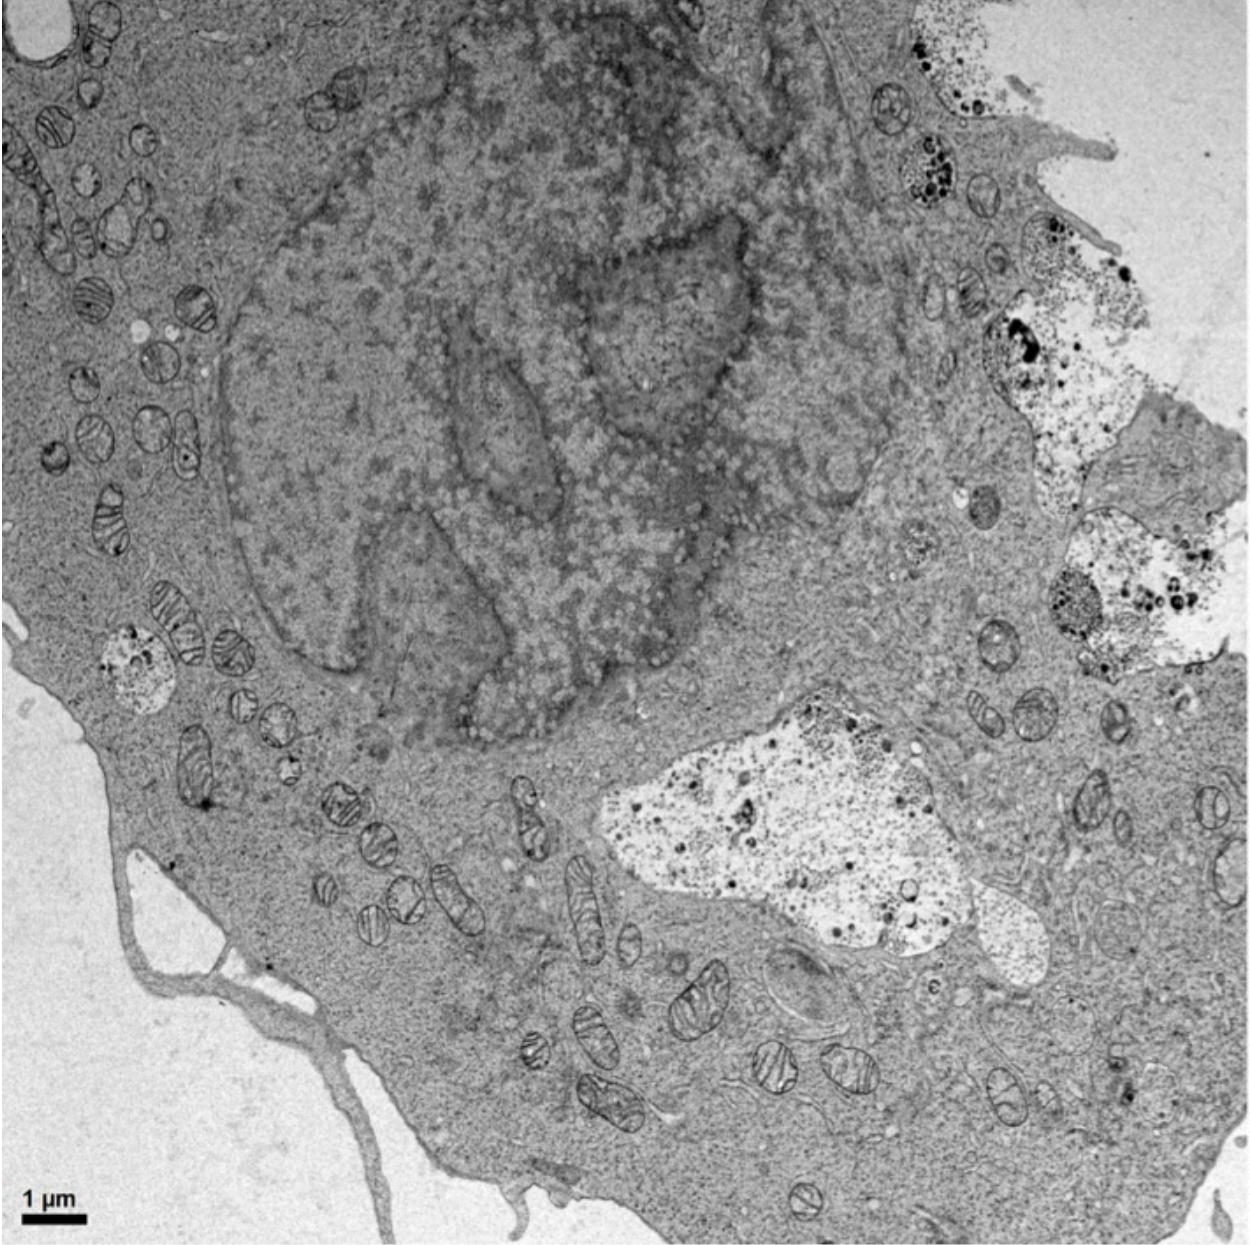

Supplement: srep34879-s1.pdf [file srep34879-s1.pdf]
